# Supplementary material for: Overexpression of an auxin receptor OsAFB6 significantly enhanced grain yield by increasing cytokinin and decreasing auxin concentrations in rice panicle
Source: PubMed Central journal article supplement (PMC6145926; doi:10.1038/s41598-018-32450-x), 2018-09-19
Supplement: 41598_2018_32450_MOESM1_ESM.pdf [file 41598_2018_32450_MOESM1_ESM.pdf]

**Supplementary information**

**Overexpression of an auxin receptor *OsAFB6* significantly enhanced grain yield by increasing cytokinin and decreasing auxin concentrations in rice panicle**

Qin He, Lin Yang, Wei Hu, Jia Zhang, Yongzhong Xing

National Key Laboratory of Crop Genetic Improvement and National Center of Plant

Gene Research (Wuhan), Huazhong Agricultural University, China

\* [yzxing@mail.hzau.edu.cn](mailto:yzxing@mail.hzau.edu.cn)

## Legends

**Table S1.** Cis-elements predicted in the promoter of *OsAFB6*.

**Table S2.** Primers used for all the experiments.

**Table S3.** Recipe for the nutrient solution (1000×).

Eight reagents stored separately, 50ml of each were added into 50L water in a box.

**Figure S1.** *CCT05* expression in the mutant and control plant.

(A) long-day condition. (B) short-day condition. *OxOsAFB6* and Control plant represent the *OsAFB6* over expression mutant and the negative Zhonghua 11 plant as control, respectively. The white bars indicate the light period, and the black bars indicate dark period. The numbers below the x-axis indicate hours of the days. Error bars, standard deviation.

**Figure S2.** Copy number analysis and expression of neighboring genes around the insertion site in the mutant.

(A) Southern blot of three individual mutants. (B) Inserted site shown by the red arrow and the positions of genes nearby. (C, D, E) Expression levels of LOC\_Os03g08860, LOC\_Os03g08870 and LOC\_Os03g08850 for every 3 hours in a day under LD. (G) Expression level of LOC\_Os03g08850 under SD. (F, H) expression levels of LOC\_Os03g08850 in the control plant under LD and SD conditions. *OxOsAFB6* and Control plant represent the *OsAFB6* over expression mutant and the negative Zhonghua 11 plant as control, respectively. The white bars indicate the light period, and the black bars indicate dark period. The numbers below

the x-axis indicate hours of the days. Error bars, standard deviation.

**Figure S3.** Phenotype and expression levels of segregated population compared with *OxOsAFB6* and the control plants.

(A) Phenotype of early flowering and late flowering plants. (B) Phenotype of the control plant and the *OsAFB6* over expression mutant. (C) Their expression levels of *OsAFB6*. EF plant: early flowering plant; LF plant: late flowering plant. The early and late flowering plants were from the segregated F<sub>2</sub> population from the cross between the *OsAFB6* over expression mutant and control plant. \*\* indicated the significance level of P < 0.01.

**Figure S4.** Phenotype of double strains RNA interfered *OsAFB6* knockdown and CRIPSR *OsAFB6* knockout plants compared with the corresponding negative plants as control.

(A) Phenotype of control (left) and positive (right) double strains RNA interfered *OsAFB6* knockdown transgenic plants. (B) Phenotype of control (left) and positive (right) CRIPSR *OsAFB6* knockout plants.

**Figure S5.** *OsAFB6* gene structure with conserved domain predicted by BLAST.

The white bars indicate the 5' and 3' untranslated regions; the black bars indicate exon regions; the blue bar represents the F-box domain, as a recognizer for ubiquitination targets, located in the first exon; the red bars represent two AMN1 domains, containing LRR repeats. Both AMN1 domains were separated by intron regions.

**Figure S6.** Expression levels of flowering genes in the mutant and control plant under long day and short day condition.

*OXOsAFB6* and Control plant represent the *OsAFB6* over expression mutant and the negative Zhonghua 11 plant as control, respectively. The white bars indicate the light period, and the black bars indicate dark period. The numbers below the x-axis indicate hours of the days. Error bars, standard deviation.

**Figure S7.** Differential expressed genes according to RNA-seq.

In the *OXOsAFB6* mutant, there were 58 genes up regulated (red dots) and 229 genes down regulated (green dots) compared to the control plant.

**Table S1.** Cis-elements predicted in the promoter of *OsAFB6*.

| Site Name            | Sequence    | Function                                                             | Frequency |
|----------------------|-------------|----------------------------------------------------------------------|-----------|
| 5UTR Py-rich stretch | tttcttctct  | cis-acting element conferring high transcription levels              | 1         |
| TATA-box             | tttta       | core promoter element around -30 of transcription start              | 24        |
| CAAT-box             | caaat       | common cis-acting element in promoter and enhancer regions           | 24        |
| ACE                  | acgtgga     | cis-acting element involved in light responsiveness                  | 1         |
| G-Box                | cacgtt      | cis-acting regulatory element involved in light responsiveness       | 4         |
| ATCT-motif           | aatctaactct | part of a conserved DNA module involved in light responsiveness      | 1         |
| Box I                | ttcaaa      | light responsive element                                             | 1         |
| GT1-motif            | ggttaa      | light responsive element                                             | 1         |
| Sp1                  | cc(g/a)ccc  | light responsive element                                             | 22        |
| CATT-motif           | gcattc      | part of a light responsive element                                   | 1         |
| GAG-motif            | agagatg     | part of a light responsive element                                   | 1         |
| GATA-motif           | gatagga     | part of a light responsive element                                   | 1         |
| AuxRR-core           | ggtccat     | cis-acting regulatory element involved in auxin responsiveness       | 1         |
| ABRE                 | tacgtg      | cis-acting element involved in the abscisic acid responsiveness      | 1         |
| TATC-box             | tatccca     | cis-acting element involved in gibberellin-responsiveness            | 1         |
| HSE                  | aaaaaatttc  | cis-acting element involved in heat stress responsiveness            | 1         |
| TC-rich repeats      | atthttctca  | cis-acting element involved in defense and stress responsiveness     | 1         |
| GC-motif             | cccccg      | enhancer-like element involved in anoxic specific inducibility       | 3         |
| O2-site              | gatgatgtgg  | cis-acting regulatory element involved in zein metabolism regulation | 1         |
| Skn-1_motif          | gtcat       | cis-acting regulatory element required for endosperm expression      | 1         |
| GCN4_motif           | caagcca     | cis-regulatory element involved in endosperm expression              | 1         |

---

|                 |              |   |
|-----------------|--------------|---|
| AAGAA-motif     | gaaagaa      | 3 |
| TATCCAT/C-motif | tatccat      | 1 |
| CTAG-motif      | actagcagaa   | 1 |
| AC-I            | cccacctacc   | 2 |
| AC-II           | ccaccaaccccc | 1 |

---

**Table S2.** Primers used for all the experiments.

| <b>Gene</b>    | <b>PCR</b>                             | <b>Forward primer (F) 5'- 3'</b>          | <b>Reverse primer (R) 5'- 3'</b> |
|----------------|----------------------------------------|-------------------------------------------|----------------------------------|
| hygromycin     | Probe for southern                     | cgaagcccgtgctgca                          | tccttgccgagctgggat               |
| SP1            | primary reaction<br>from left border   | gaagtactcgccgatagtggaaacc                 |                                  |
| SP2            | secondary reaction<br>from left border | atagggttcgctcatgtgttgagcat                |                                  |
| SP3            | tertiary reaction<br>from left border  | ccagtactaaaatccagatccccgaat               |                                  |
| NTLB5          | sequencing from<br>left border         | aatccagatccccgaatta                       |                                  |
| PFRB4          | sequencing from<br>right border        | tgcaggttctctccaaatga                      |                                  |
| AD2-1          | AD primer                              | (agct)gacga(gc)(at)ga(agct)a(<br>at)gaa   |                                  |
| AD2a           | AD primer                              | (agct)gtcga(gc)(at)ga(agct)a(a<br>t)gaa   |                                  |
| AD8            | AD primer                              | ag(at)g(agct)ag(at)a(agct)ca(a<br>t)agg   |                                  |
| AD10           | AD primer                              | (at)gtg(agtc)ag(at)a(agct)ca(a<br>gct)aga |                                  |
| AD11           | AD primer                              | tg(at)g(agct)ag(gc)a(agct)ca(g<br>c)aga   |                                  |
| <i>OsAFB6</i>  | Subcellular<br>localization            | gaattcatgtccgaggaggacgacga                | gaattctaggatcttcacgaatggtg       |
| <i>Ghd7</i>    | Subcellular<br>localization            | gaattcatggggatggccaatgagga                | gaattctctgaaccattgtccaagct       |
| <i>CCT05</i>   | qRT                                    | ctaccttctagtgttctagctcatc                 | caactagaactttggctaatacctatg      |
| <i>CCT05</i>   | OX                                     | cccgggatggagatggagctagggtt                | ggatccctagaaggttaggcacga         |
| LOC_Os03g08850 | qRT                                    | ctccggaatgcaccatttcta                     | cgttctcaggctggctattt             |
| LOC_Os03g08860 | qRT                                    | ccttcaacgagcagaacaaatg                    | ctttacggggctgtcatagt             |
| LOC_Os03g08870 | qRT                                    | ctgcaaatgactctgacaaagg                    | gacgagagcgaagaggattac            |
| <i>Ehd1</i>    | qRT                                    | tggaaatctcgaaaaaccg                       | gcgctagcaaagcttcggt              |
| <i>Hd3a</i>    | qRT                                    | gtcactatcatcatccagcatg                    | ccttgctcagctatttaattgcataa       |
| <i>RFT1</i>    | qRT                                    | tgacctagattcaaagtctaactctt                | tgccggccatgtcaaattaataac         |
| <i>OsGI</i>    | qRT                                    | atcggttctgcaggccgaga                      | tcaccaatgcttctgggctat            |
| <i>Ghd7</i>    | qRT                                    | aggtgctacgagaagcaaatcc                    | gggcctcatctcggcatag              |
| <i>Ghd7.1</i>  | qRT                                    | aatggaagcaatgggcagaatggg                  | tgatcactgcagccactctatgct         |
| <i>Hd1</i>     | qRT                                    | tcagcaacagcatatctttctcatca                | tctggaatttggcatatctatcacc        |

---

|                |     |                         |                          |
|----------------|-----|-------------------------|--------------------------|
| <i>Ubq</i>     | qRT | aaccagctgaggcccaaga     | acgattgatttaaccagtccatga |
| <i>OsIAA1</i>  | qRT | ggtgaacgggacggagta      | ctggcaagttccacaaacate    |
| <i>OsIAA2</i>  | qRT | ccgcctacttctcctcct      | tggttgaggcattgg          |
| <i>OsIAA3</i>  | qRT | acaaggatggtgactggatg    | ccaattgcatctgagccttc     |
| <i>OsIAA4</i>  | qRT | cccatgtcctcacctatgaag   | cttgcaatcctgagcttcttac   |
| <i>OsIAA6</i>  | qRT | tggaagctgagagaagcattag  | accaggaagaccaagcttag     |
| <i>OsIAA7</i>  | qRT | ccagcaaagcatctctgaac    | gggacaccatccatgtttatct   |
| <i>OsIAA8</i>  | qRT | tctgacatacgaagaccaggag  | ccgctcttgaatcctcaat      |
| <i>OsIAA9</i>  | qRT | ccaccaaggcgagaagaaa     | cccaaccagcatccaatcc      |
| <i>OsIAA10</i> | qRT | ggatgctcgttgagatgtt     | atcgctgaccaagaccattc     |
| <i>OsIAA11</i> | qRT | agttgtccatggcgttcc      | ctctcagcttattgctctccttc  |
| <i>OsIAA12</i> | qRT | ggtgaggtcgtacaggaaga    | gtgatgggctcgtctttgtt     |
| <i>OsIAA13</i> | qRT | ccagtcatgaagagcaagaa    | gaccttcacgaaggcagag      |
| <i>OsIAA14</i> | qRT | ttcgccgtcgctatga        | cgcattatecgcagcttctt     |
| <i>OsIAA15</i> | qRT | aaggccaagtctctgaagg     | gatggtgaagtgggagaagaac   |
| <i>OsIAA16</i> | qRT | aggaagagaggagccttga     | ttcccttggtccatcag        |
| <i>OsIAA17</i> | qRT | gcaagaacacgatggctacta   | ctgacctgacgtacaggaac     |
| <i>OsIAA18</i> | qRT | gagagcagctgattcaagagag  | tggtaggctttgaatgttagg    |
| <i>OsIAA19</i> | qRT | atcttccttgggacttgtttact | ttgtctgacctgtctgttcc     |
| <i>OsIAA20</i> | qRT | accatacgtgtcaccta       | accagtatcttgagccgttc     |
| <i>OsIAA21</i> | qRT | ctctttggctctggagaagatg  | catcaggcggcaatcagata     |
| <i>OsIAA22</i> | qRT | tcagatggcattgcaactaga   | catcggtctccctcattatc     |
| <i>OsIAA23</i> | qRT | gtcaaggtggcctgga        | gccaacatgccgtggag        |
| <i>OsIAA24</i> | qRT | cctcttcaccaagtgtcttc    | cagggcacatctccaacaa      |
| <i>OsIAA25</i> | qRT | tcagatggcattgcaactagag  | catcggtctccctcattatc     |
| <i>OsIAA26</i> | qRT | gtactctgtgaaggtgagcat   | agcagtagaacatgtcgttgag   |
| <i>OsIAA27</i> | qRT | tgacatggatgggtacaag     | atgagtcattctggtgaggac    |
| <i>OsIAA28</i> | qRT | gaatatcaggaggaggaagagga | gaccaccaaaagatggtttct    |
| <i>OsIAA29</i> | qRT | ctgctgacgaagatggagatg   | ggatcatcgttgctcgtgtat    |
| <i>OsIAA30</i> | qRT | attggaaactgtgggtctcat   | cctcgtagggtggcacatatt    |
| <i>OsIAA31</i> | qRT | gcagcagaaggaggatgct     | gtagccctgtacaccttgag     |
| <i>AUX1</i>    | qRT | ctgatcgctgtgcaagtaa     | cagatcggtgagtgttgaa      |
| <i>PIN1</i>    | qRT | gtctgctcaggtggaactt     | gaacagaccgagactgaacat    |
| <i>PIN2</i>    | qRT | cgtctcctcaggtggaatc     | catgaacaagcctaagctgaac   |
| <i>PIN3</i>    | qRT | gtcgagaagtccatctccattc  | ttgccacacgcgatgat        |
| <i>PIN5a</i>   | qRT | ccctacctcaatccatcacatc  | gtagggagacaagcattccaa    |
| <i>OsCKX2</i>  | qRT | atctaccccatgaaccgcaac   | tgcacgaatcttgccaga       |

---



---

|               |              |                                      |                                      |
|---------------|--------------|--------------------------------------|--------------------------------------|
| <i>OsAFB6</i> | OX           | cccgggatgtccgaggaggacgacga           | ggatccttataggatcttcacgaatg           |
| <i>OsAFB6</i> | RNAi         | actagtggtagcttcgctggagacagca<br>atct | gagctcggatcctgcagctctgata<br>gatggct |
| <i>OsAFB6</i> | CRISPR       | gtgtaccggtcccgcgccgagtcg             | aaaccgactcggcgcgggaccggt             |
| <i>OsAFB6</i> | Promoter-GUS | ggatccgactgcaagcaccgaatgct           | ctgcaggaggaactggagcaccgt             |

---

**Table S3.** Recipe for the nutrient solution (1000×).

|   | <b>reagent</b>                                                   | <b>g/L</b>   |
|---|------------------------------------------------------------------|--------------|
| 1 | NH <sub>4</sub> NO <sub>3</sub>                                  | 114.3g       |
| 2 | NaH <sub>2</sub> PO <sub>4</sub> ·2H <sub>2</sub> O              | 50.4g        |
| 3 | K <sub>2</sub> SO <sub>4</sub>                                   | 89.3g        |
| 4 | CaCl <sub>2</sub>                                                | 110.8g       |
| 5 | MgSO <sub>4</sub> ·7H <sub>2</sub> O                             | 405g         |
| 6 | NaSiO <sub>3</sub> ·9H <sub>2</sub> O                            | 47.6g        |
|   | EDTA·Na <sub>2</sub> ·2H <sub>2</sub> O                          | 18.85g/500ml |
| 7 | FeSO <sub>4</sub> ·7H <sub>2</sub> O                             | 13.98g/500ml |
|   | Water bath at 65°C, then mix the two reagents after cool to room |              |
|   | MnCl <sub>2</sub> ·4H <sub>2</sub> O                             | 1.875g       |
|   | (NH <sub>4</sub> ) <sub>6</sub> Mo <sub>7</sub> O <sub>24</sub>  | 0.0925g      |
|   | H <sub>3</sub> BO <sub>3</sub>                                   | 1.1675g      |
|   | ZnSO <sub>4</sub> ·7H <sub>2</sub> O                             | 0.04375g     |
| 8 | CuSO <sub>4</sub> ·5H <sub>2</sub> O                             | 0.03875g     |
|   | FeCl <sub>3</sub> ·6H <sub>2</sub> O                             | 9.625g       |
|   | Citric acid·H <sub>2</sub> O                                     | 14.875g      |
|   | 70% H <sub>2</sub> SO <sub>4</sub>                               | 62.5ml       |

Eight reagents stored separately, 50ml of each were added into 50L water in a box.

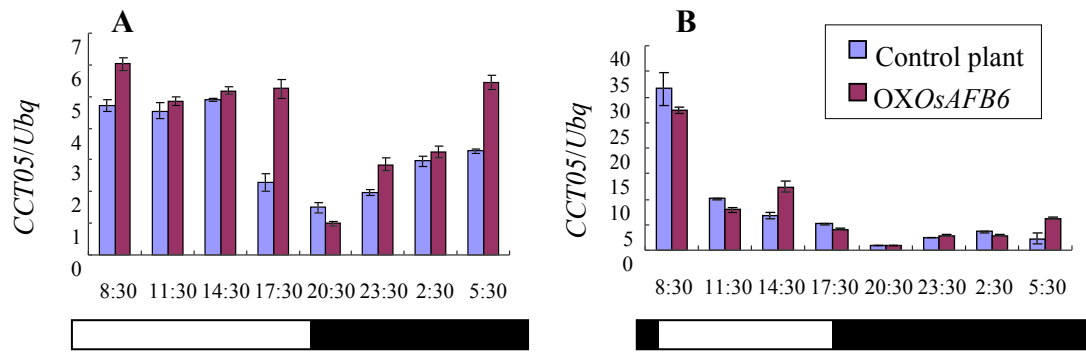

**Figure S1.** *CCT05* expression in the mutant and control plant.

(A) long-day condition. (B) short-day condition. *OXOsAFB6* and Control plant represent the *OsAFB6* over expression mutant and the negative Zhonghua 11 plant as control, respectively. The white bars indicate the light period, and the black bars indicate dark period. The numbers below the x-axis indicate hours of the days. Error bars, standard deviation.

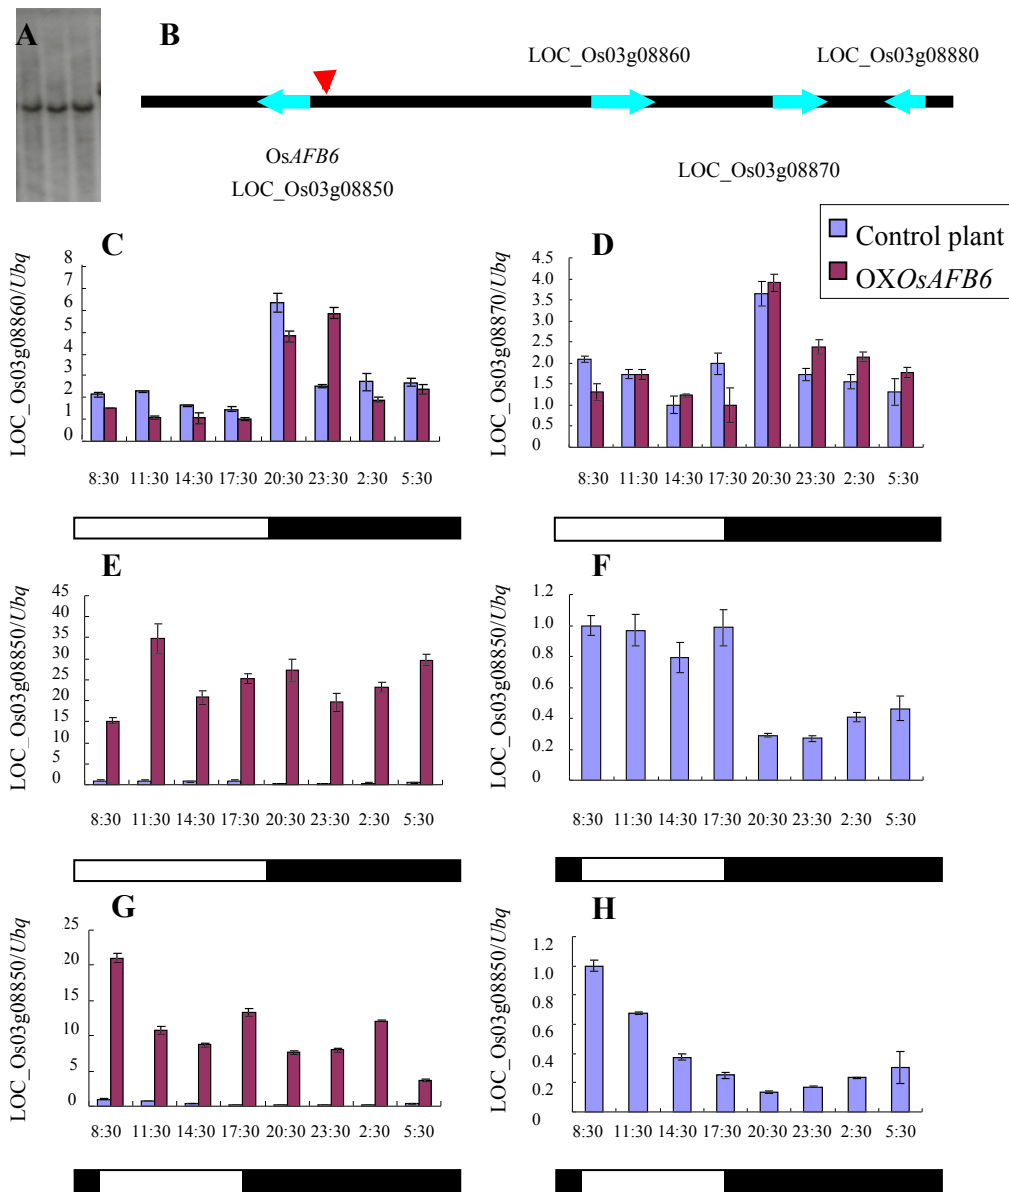

**Figure S2.** Copy number analysis and expression of neighboring genes around the insertion site in the mutant.

(A) Southern blot of three individual mutants. (B) Inserted site shown by the red arrow and the positions of genes nearby. (C, D, E) Expression levels of LOC\_Os03g08860, LOC\_Os03g08870 and LOC\_Os03g08850 for every 3 hours in a day under LD. (G) Expression level of LOC\_Os03g08850 under SD. (F, H) expression levels of LOC\_Os03g08850 in the control plant under LD and SD conditions. OXOsAFB6 and Control plant represent the *OsAFB6* over expression

mutant and the negative Zhonghua 11 plant as control, respectively. The white bars indicate the light period, and the black bars indicate dark period. The numbers below the x-axis indicate hours of the days. Error bars, standard deviation.

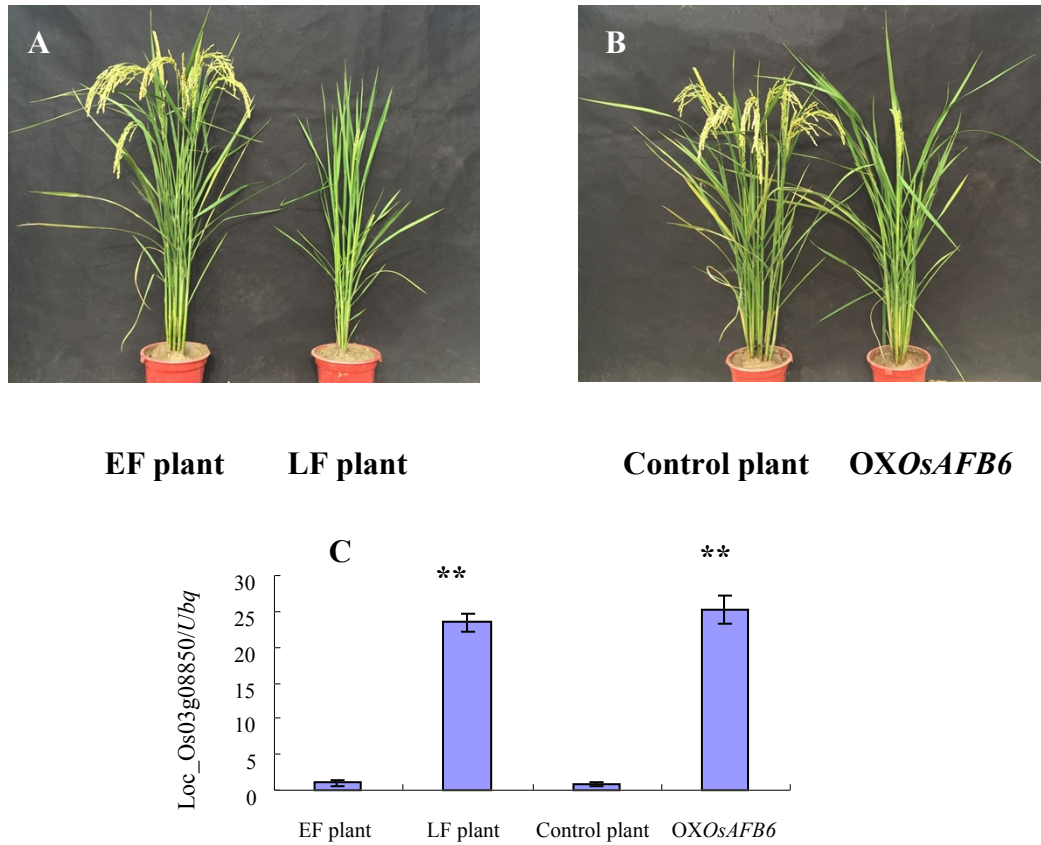

**Figure S3.** Phenotype and expression levels of segregated population compared with *OXOsAFB6* and the control plants.

(A) Phenotype of early flowering and late flowering plants. (B) Phenotype of the control plant and the *OsAFB6* over expression mutant. (C) Their expression levels of *OsAFB6*. EF plant: early flowering plant; LF plant: late flowering plant. The early and late flowering plants were from the segregated  $F_2$  population from the cross between the *OsAFB6* over expression mutant and control plant. \*\* indicated the significance level of  $P < 0.01$ .

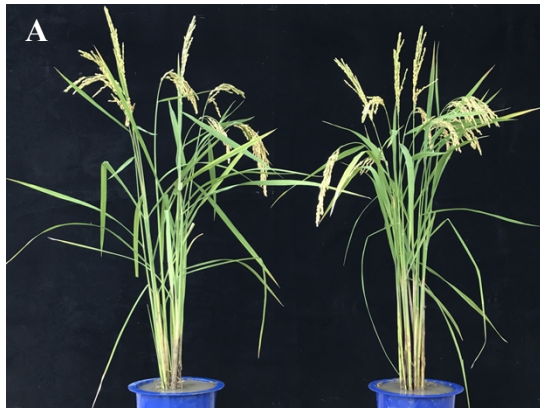

**RNAiOsAFB6(-) RNAiOsAFB6(+)**

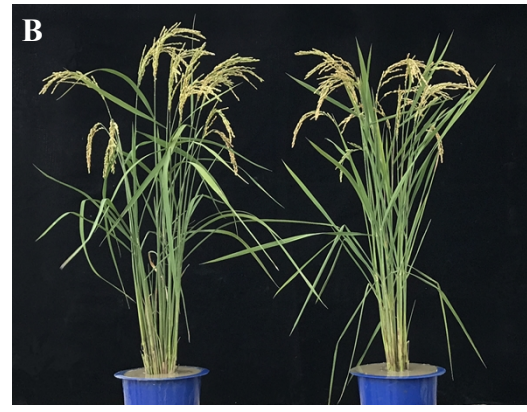

**CRISPROsAFB6(-) CRISPROsAFB6(+)**

**Figure S4.** Phenotype of double strains RNA interfered *OsAFB6* knockdown and CRIPSR *OsAFB6* knockout plants compared with the corresponding negative plants as control.

**(A)** Phenotype of control (left) and positive (right) double strains RNA interfered *OsAFB6* knockdown transgenic plants. **(B)** Phenotype of control (left) and positive (right) CRIPSR *OsAFB6* knockout plants.

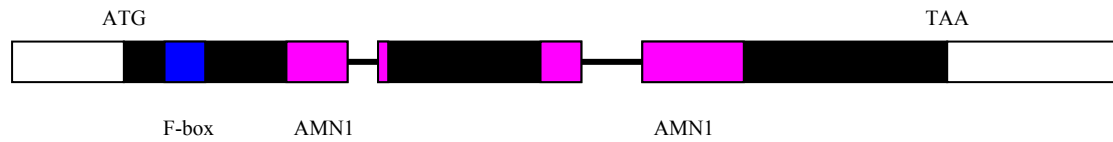

**Figure S5.** *OsAFB6* gene structure with conserved domain predicted by BLAST.

The white bars indicate the 5' and 3' untranslated regions; the black bars indicate exon regions; the blue bar represents the F-box domain, as a recognizer for ubiquitination targets, located in the first exon; the red bars represent two AMN1 domains, containing LRR repeats. Both AMN1 domains were separated by intron regions.



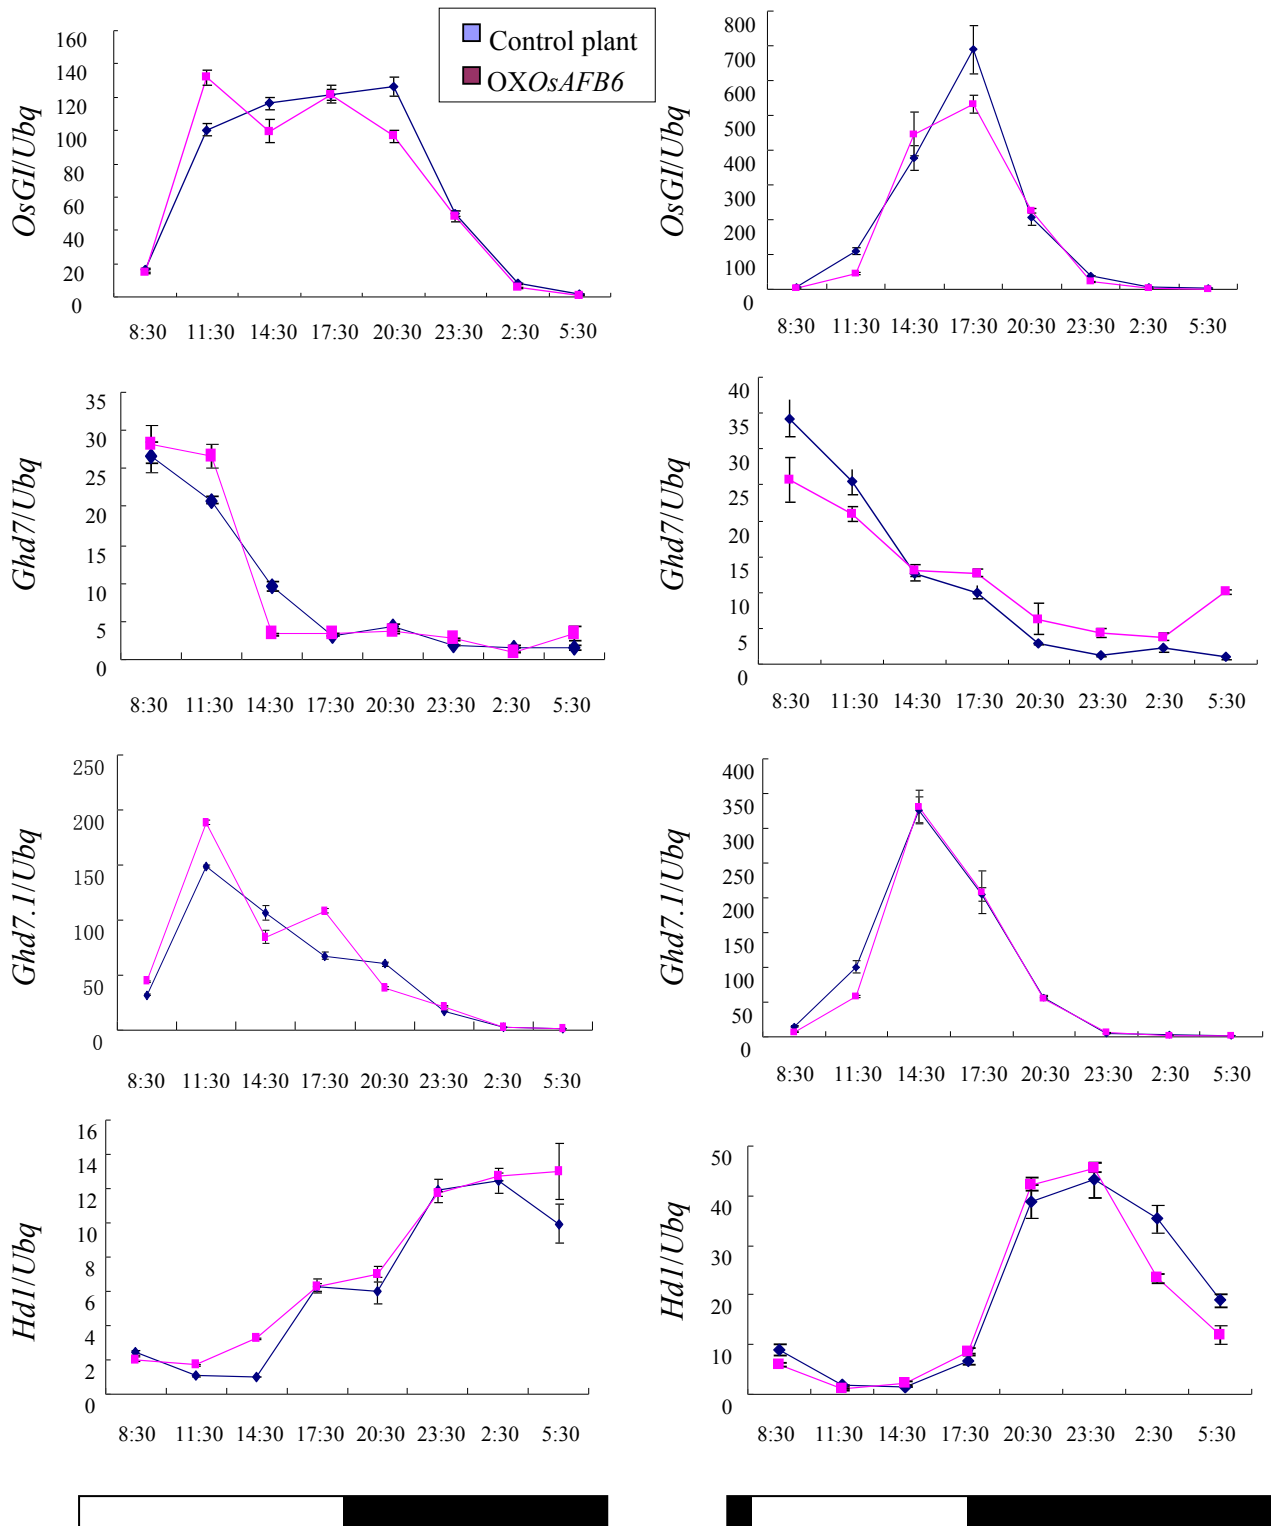

**Figure S6.** Expression levels of flowering genes in the mutant and control plant under long day and short day condition.

*OXOsAFB6* and Control plant represent the *OsAFB6* over expression mutant and the

negative Zhonghua 11 plant as control, respectively. The white bars indicate the light period, and the black bars indicate dark period. The numbers below the x-axis indicate hours of the days. Error bars, standard deviation.

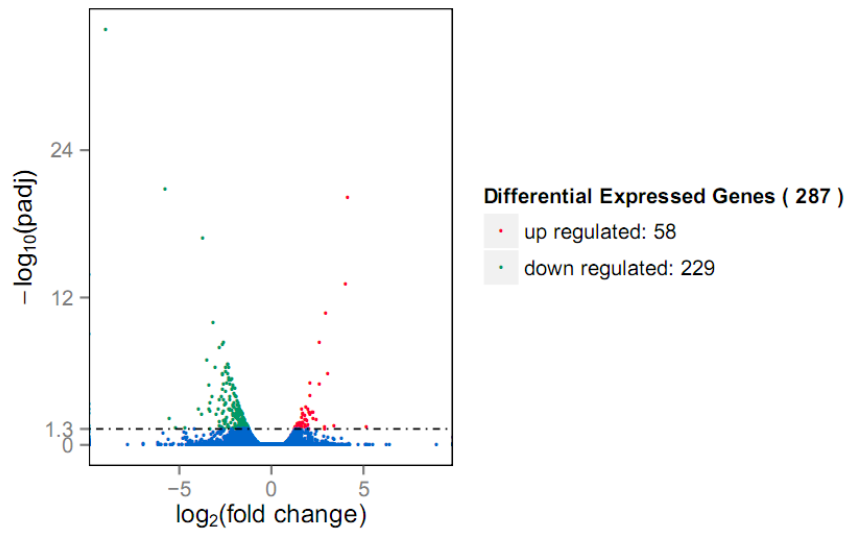

**Figure S7.** Differential expressed genes according to RNA-seq.

In the *OXOsAFB6* mutant, there were 58 genes up regulated (red dots) and 229 genes down regulated (green dots) compared to the control plant.
