# Supplementary material for: Overexpression of an auxin receptor OsAFB6 significantly enhanced grain yield by increasing cytokinin and decreasing auxin concentrations in rice panicle
Source: Sci Rep. 2018 Sep 19;8:14051. doi: 10.1038/s41598-018-32450-x (PMC6145926; doi:10.1038/s41598-018-32450-x)
Supplement: Supplementary file 3 — Dataset 3 [file 41598_2018_32450_MOESM3_ESM.pdf]

**Supplementary information**

**Overexpression of an auxin receptor *OsAFB6* significantly enhanced grain yield by increasing cytokinin and decreasing auxin concentrations in rice panicle**

Qin He, Lin Yang, Wei Hu, Jia Zhang, Yongzhong Xing

National Key Laboratory of Crop Genetic Improvement and National Center of Plant Gene Research (Wuhan), Huazhong Agricultural University, China

\* yzxing@mail.hzau.edu.cn

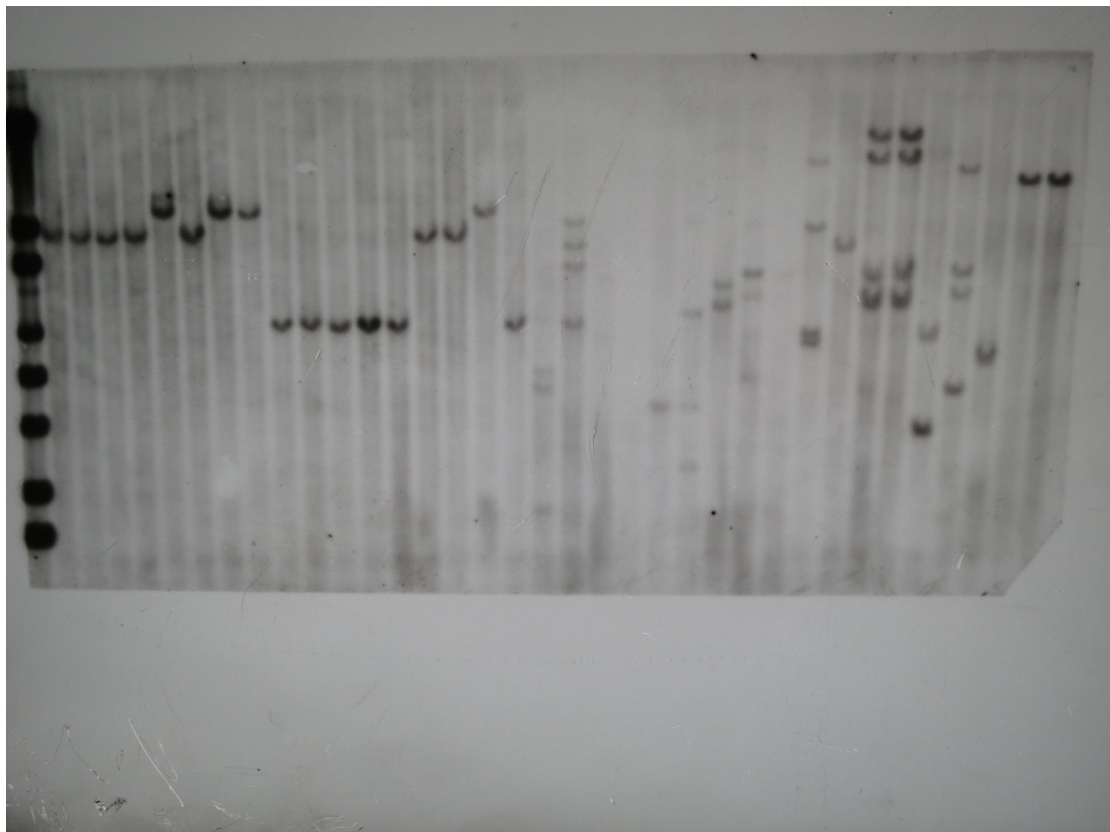

original picture of Southern Blot result, we cropped lane 2-4 in Fig S2
